# Supplementary material
Source: PubMed Central journal article supplement (PMC3095972)

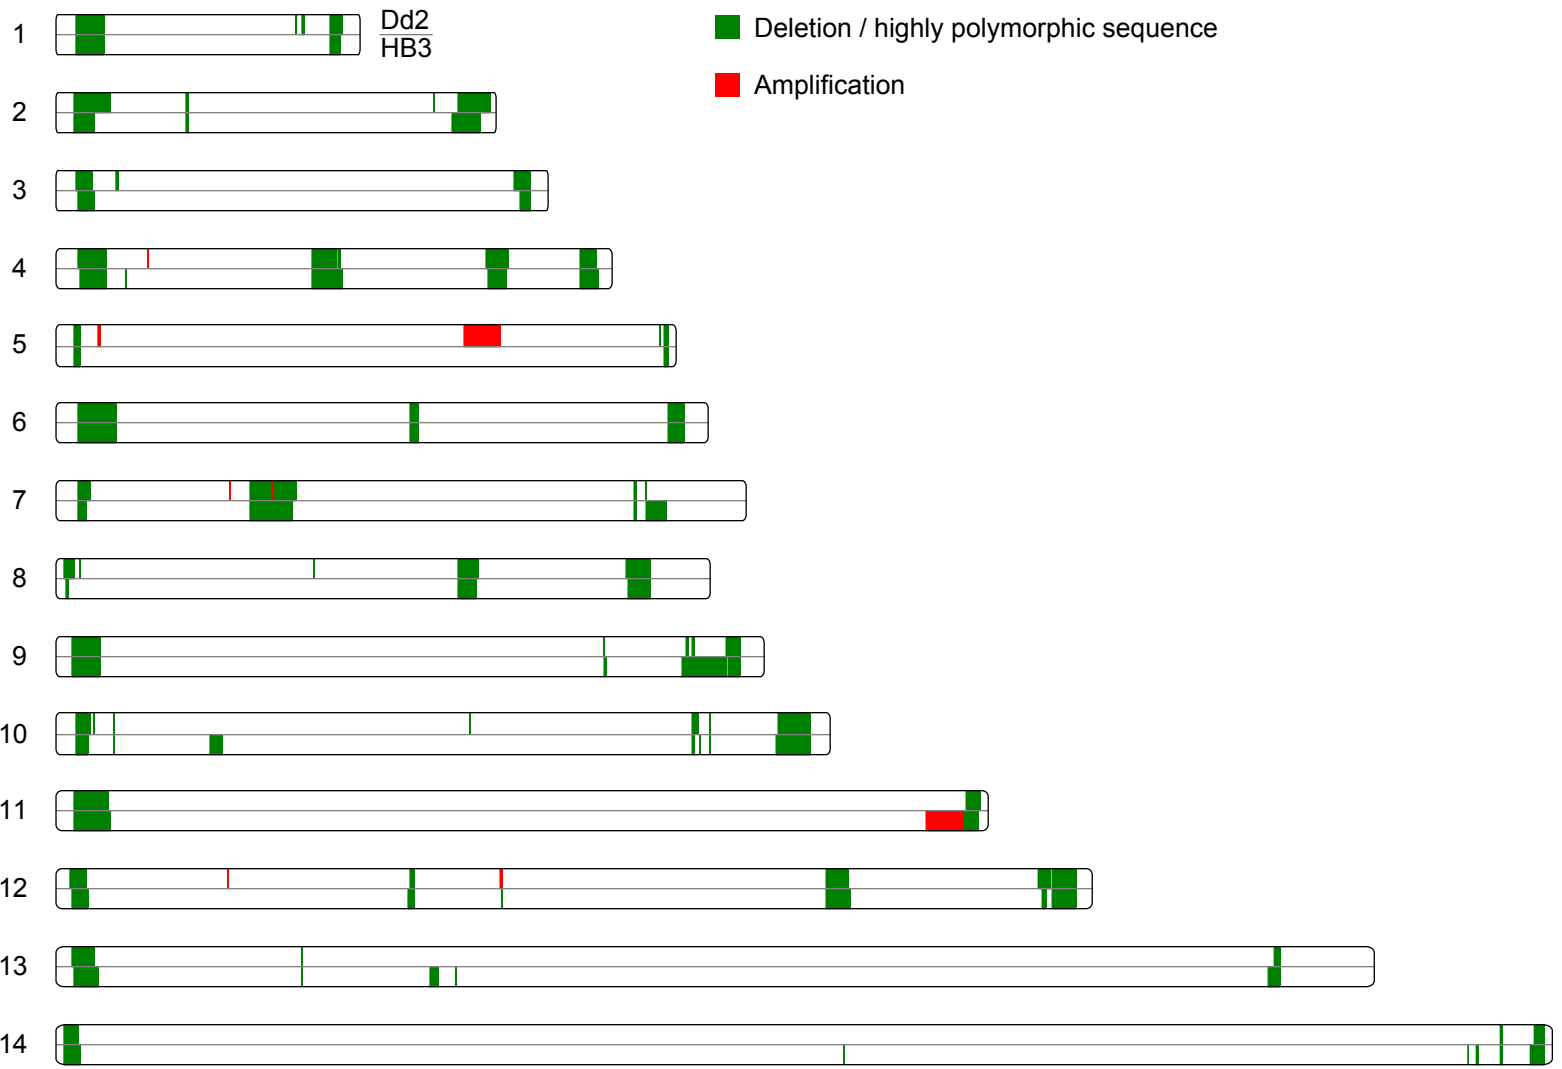

Supplement: NIHMS102430-supplement-1.pdf [file NIHMS102430-supplement-1.pdf]

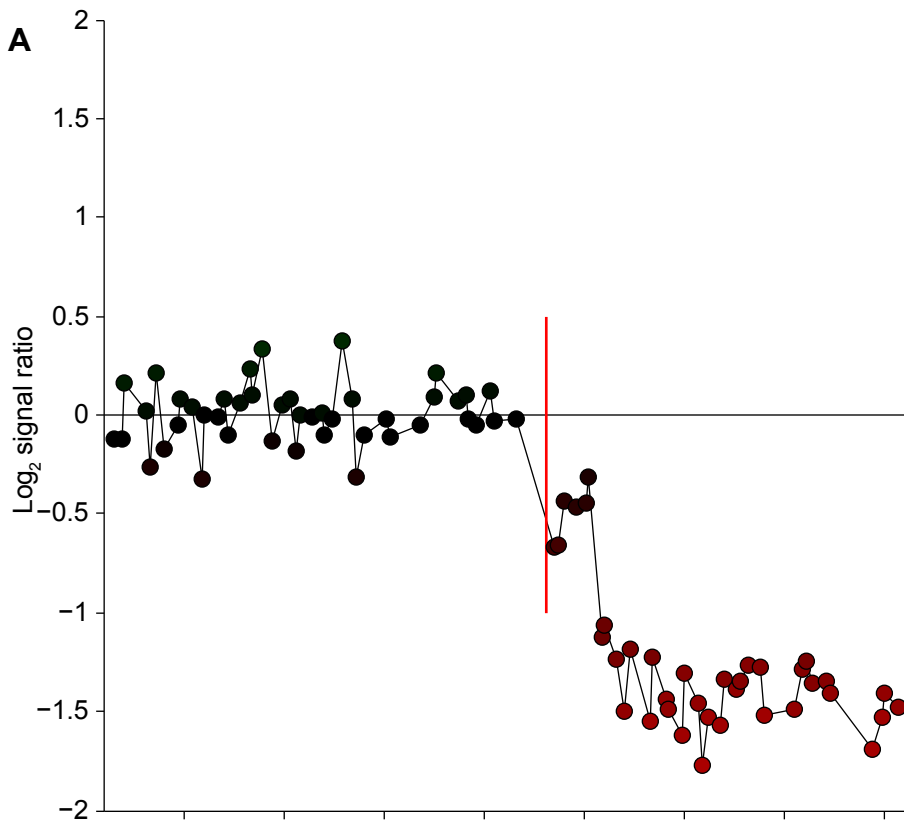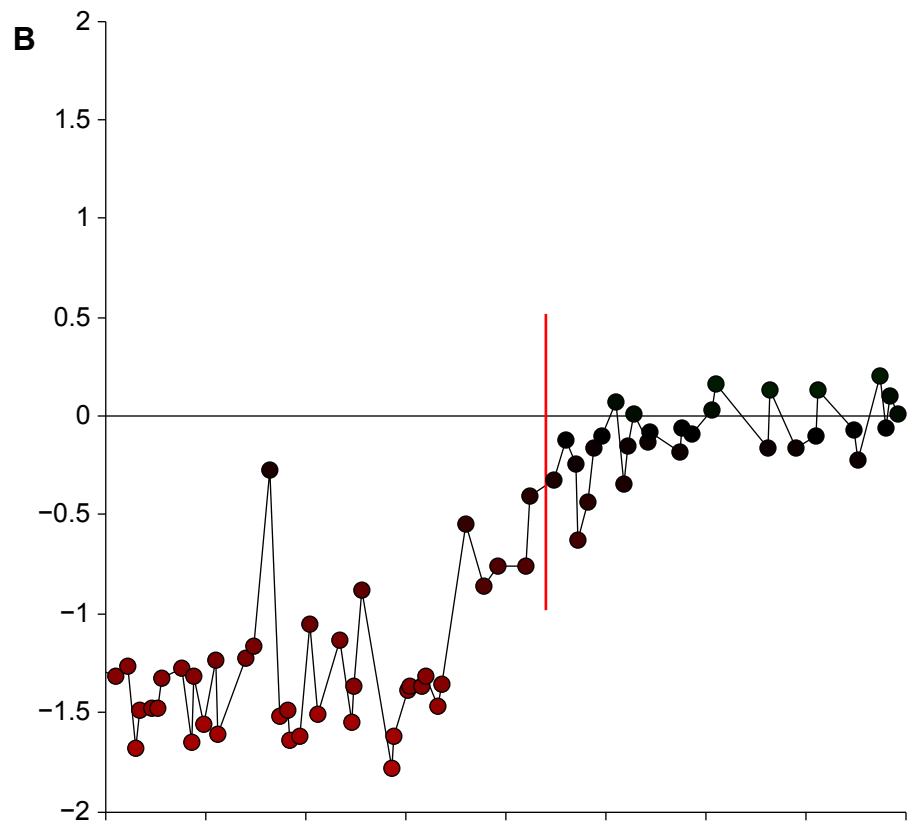

Supplement: NIHMS102430-supplement-2.pdf [file NIHMS102430-supplement-2.pdf]

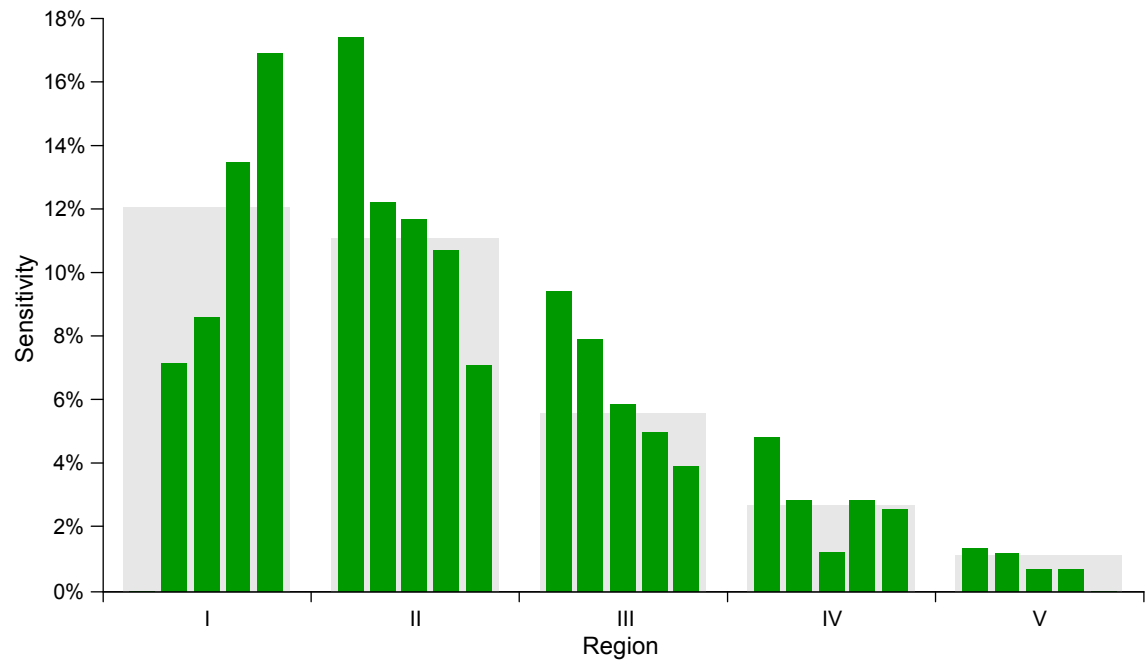

Supplement: NIHMS102430-supplement-3.pdf [file NIHMS102430-supplement-3.pdf]

# SNPs in *pfcr1*

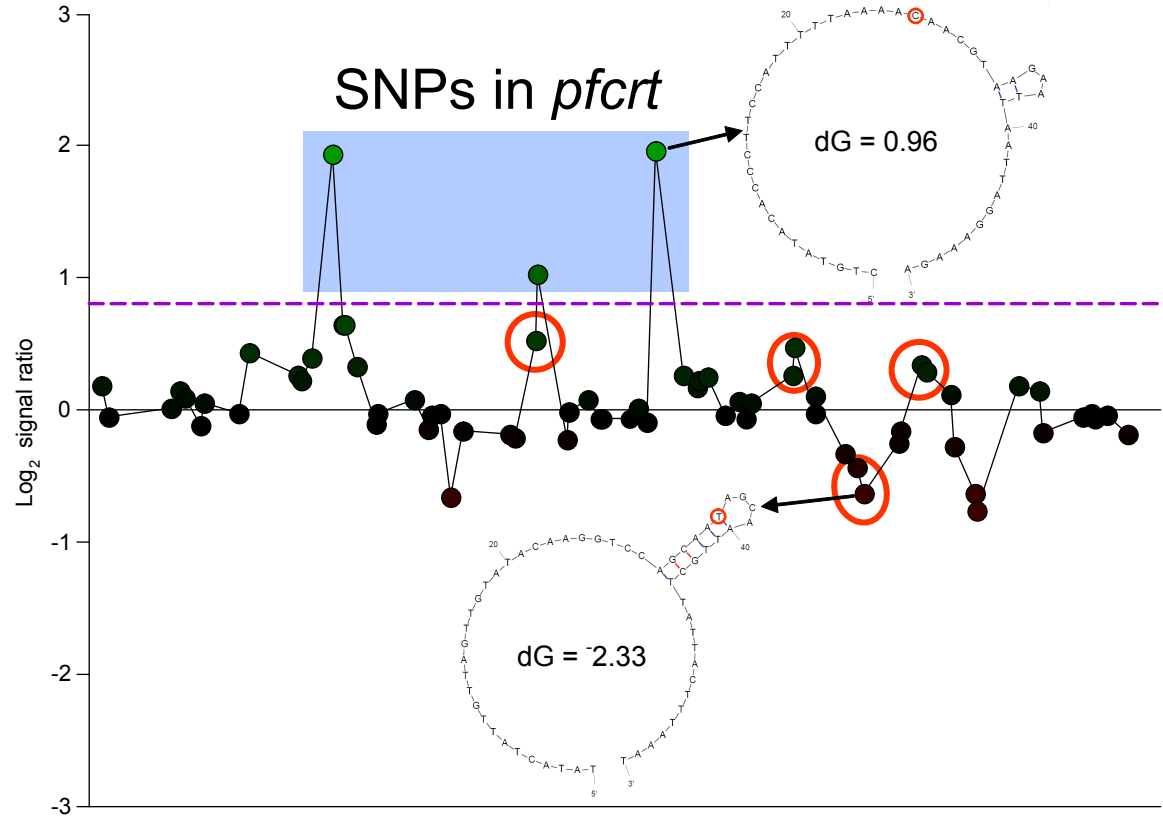

Supplement: NIHMS102430-supplement-4.pdf [file NIHMS102430-supplement-4.pdf]
